# Supplementary material
Source: Research Square preprint supplement (doi:10.21203/rs.3.rs-8571285/v1)
Supplement: Supplementary file 1 [file d35372d4fac53bc655ad6a51.docx]

**Separation of α-Fe phase from Nd2Fe17N3 dramatically broadening microwave absorption bandwidth at low frequency**

Peng Wanga*, Haiqing Hangb, Shibo Wangb, Hecheng Zhaob, Keli Zhangb, Xingcheng Lic, WenXiang Jinc, Yuyan Hand*, and Jiaheng Wang e*

1. SEM images of samples


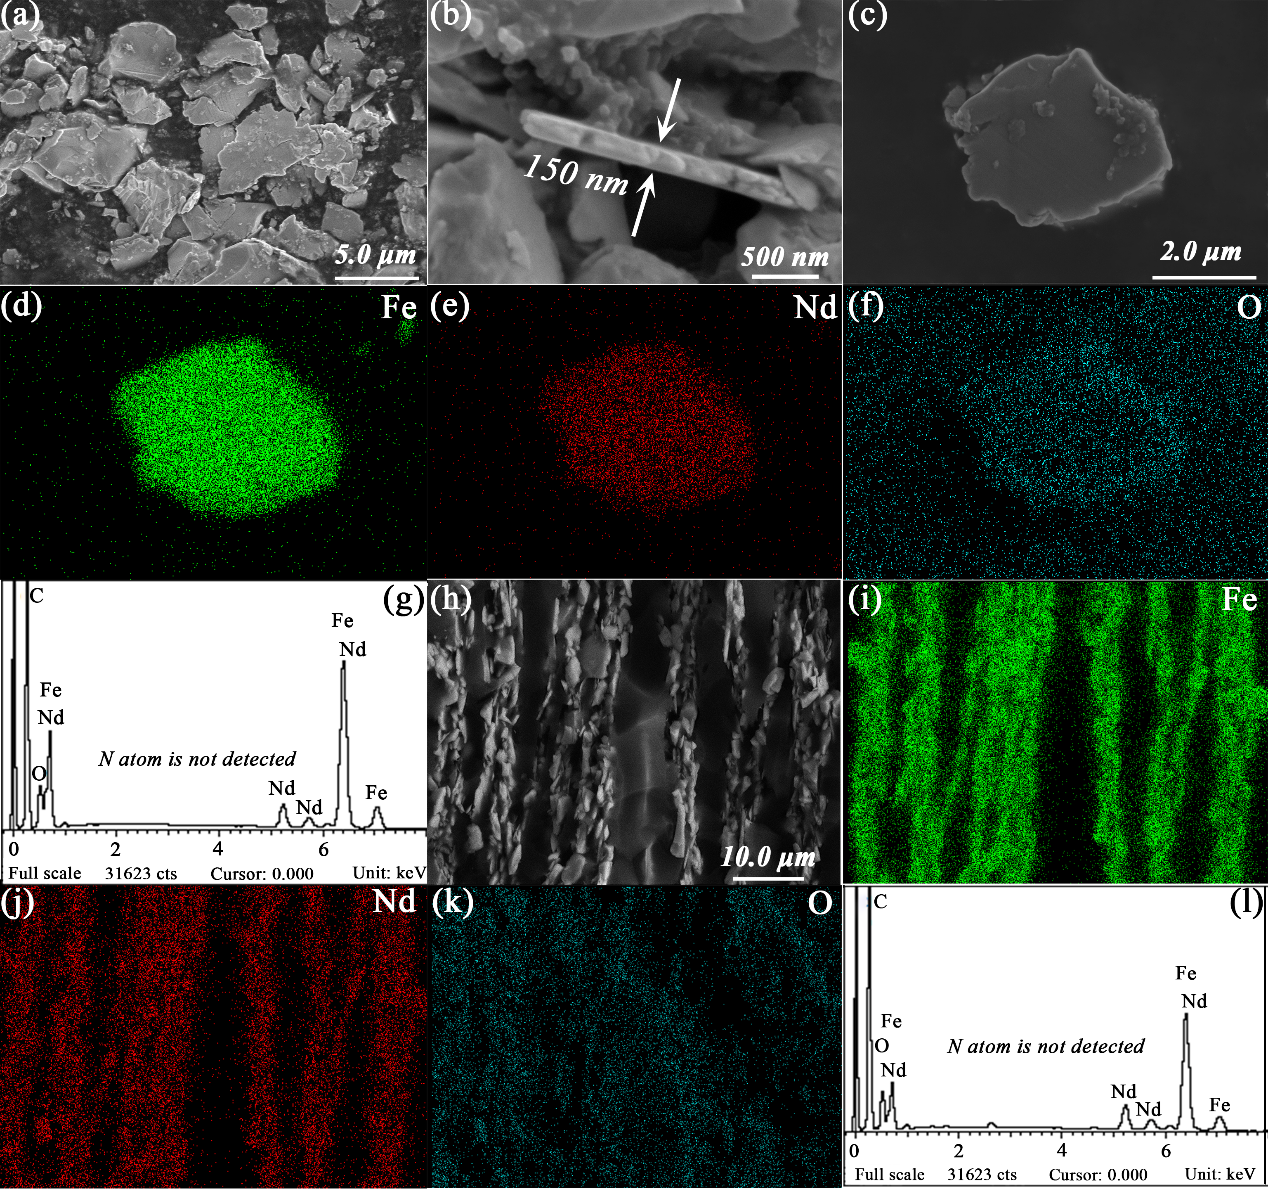


Fig. 1 Morphology of powder particles (a) (b) (c), elemental mappings of powder particles (d) (e) (f), elemental mappings of cross section of oriented sample (h) (i) (j) (k), and EDS of powder particles (g) (l).

1. Complex permeability and magnetic loss in 1-18 GHz of absorbers before and after magnetic orientation


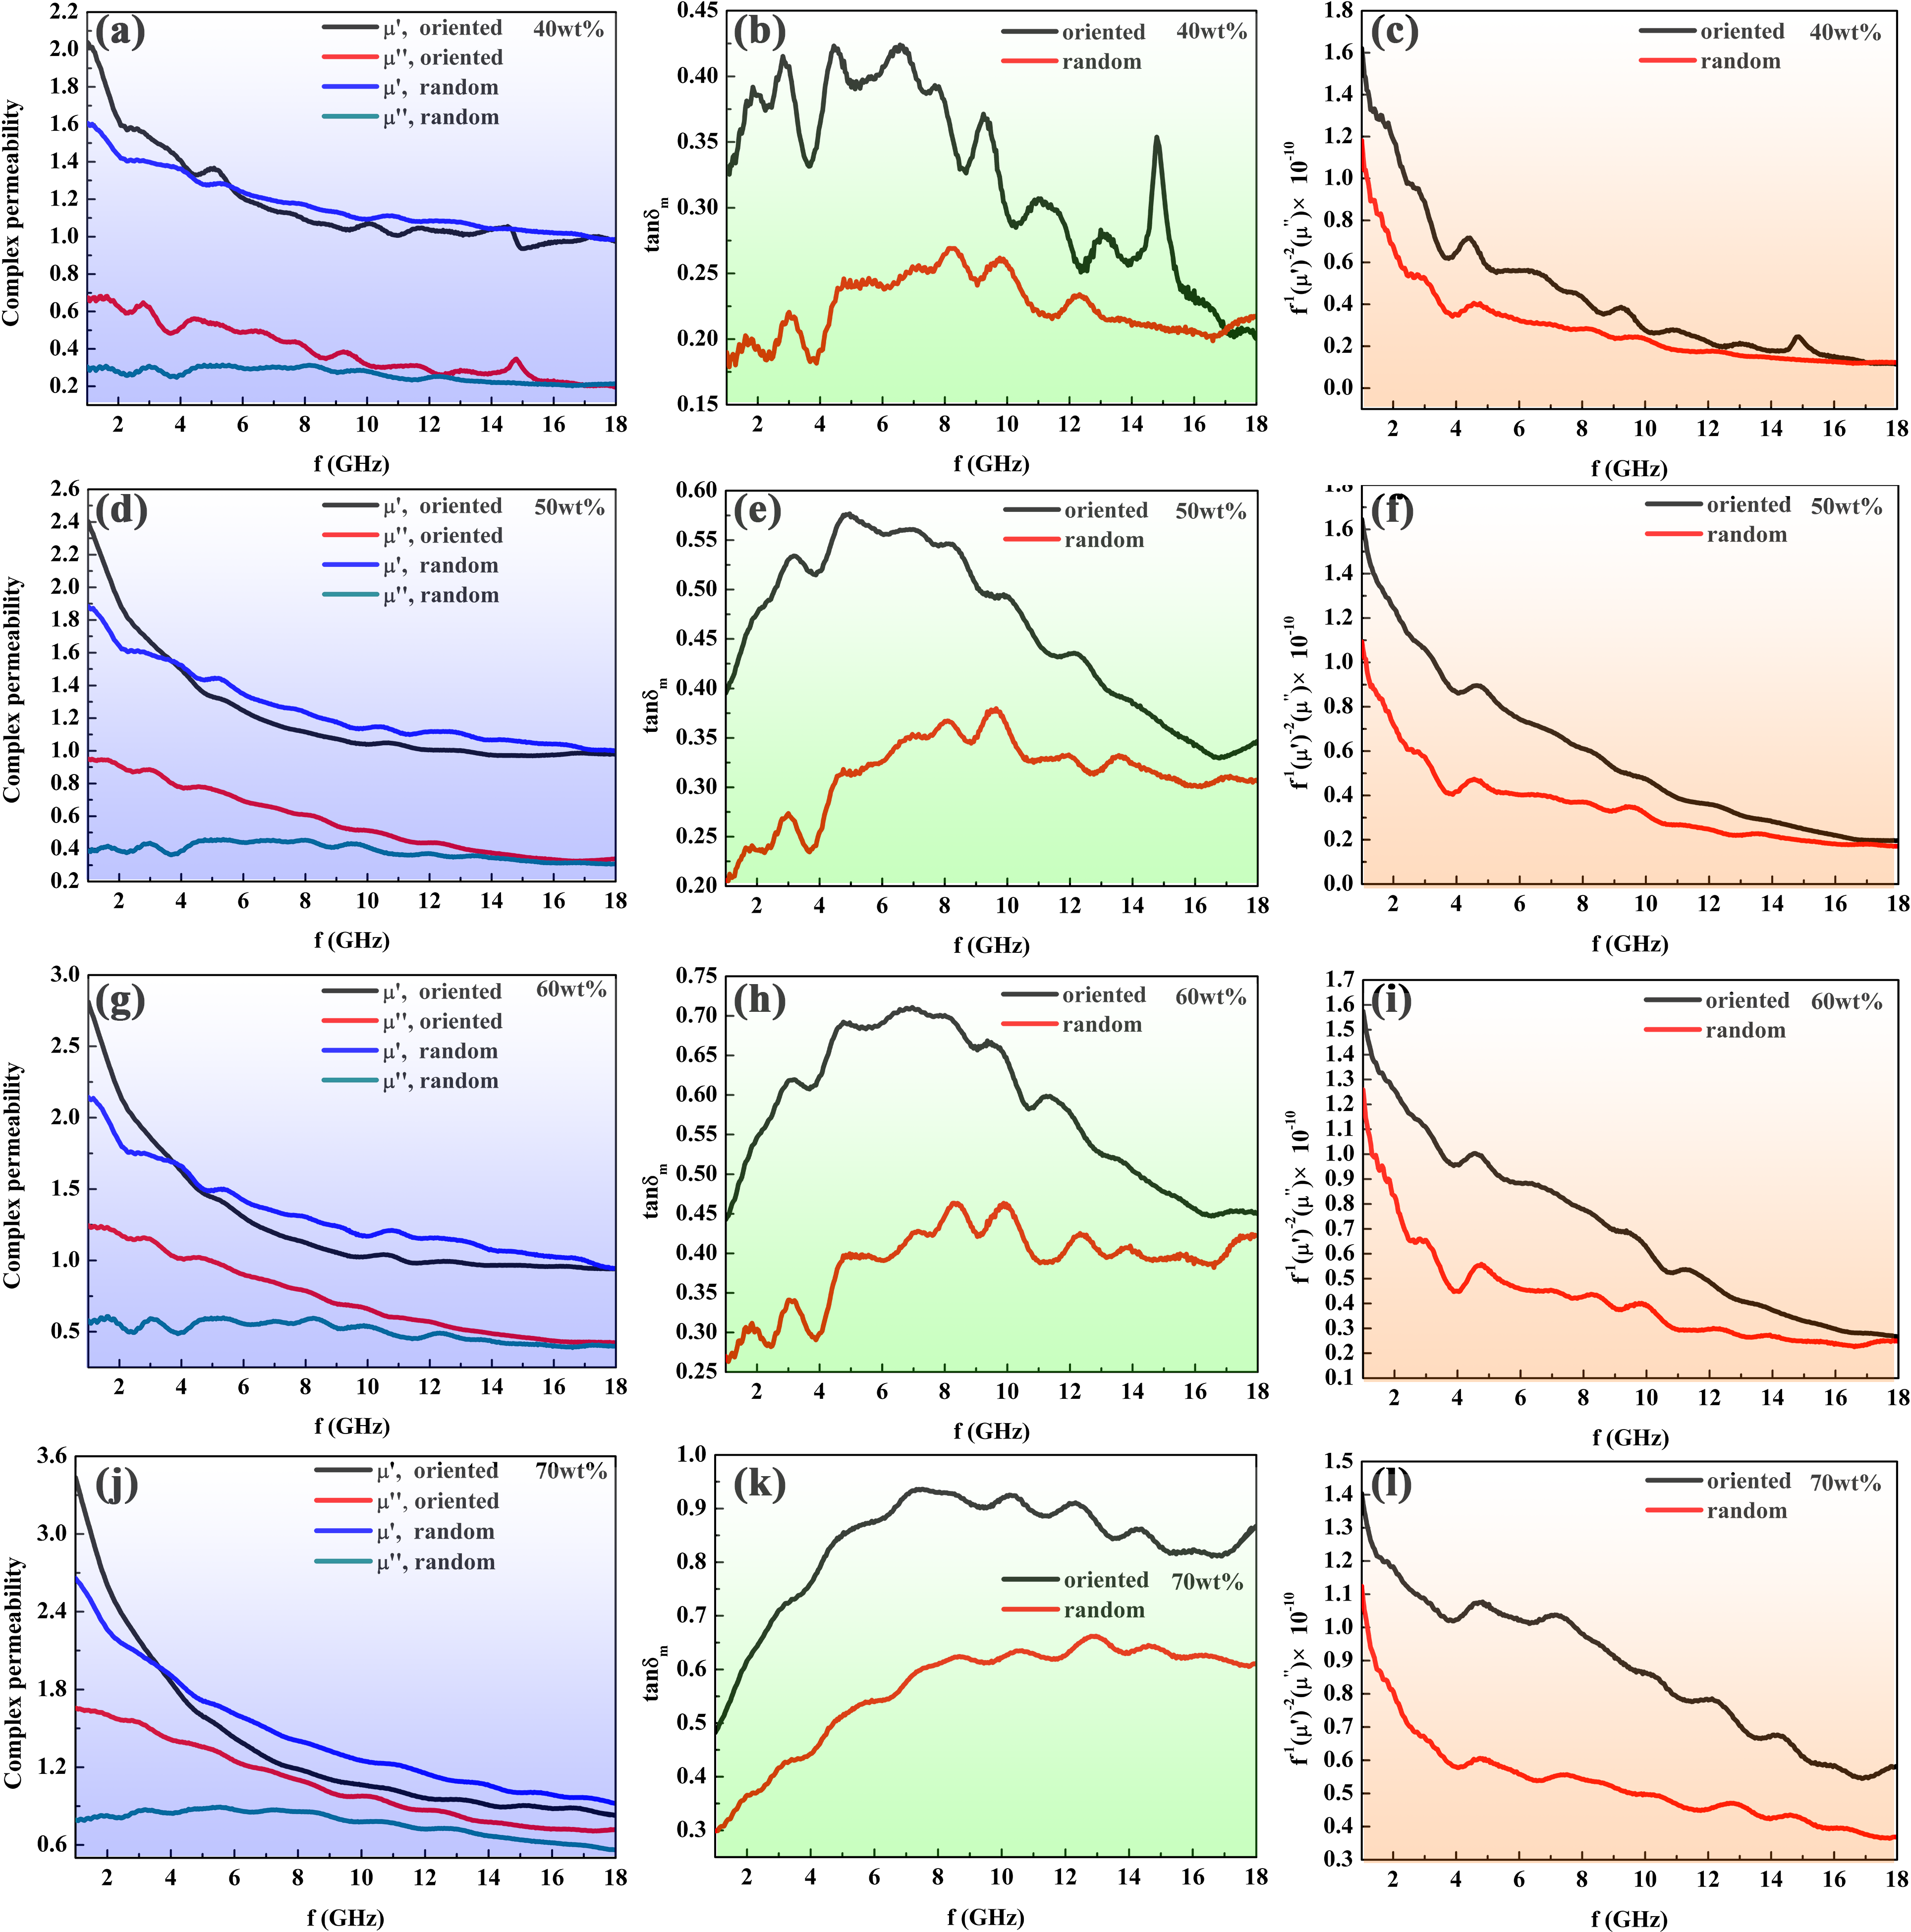


Fig. 2 Complex permeability in 1-18 GHz of absorbers before and after magnetic orientation (a) (d) (g) (j), magnetic loss angle tangents tanδm in 1-18 GHz of absorbers before and after magnetic orientation (b) (e) (h) (k), and curves in 1-18 GHz of absorbers before and after magnetic orientation, related to magnetic loss (c) (f) (i) (l).

1. Fitted frequency spectra of complex permeability of absorbers before magnetic orientation


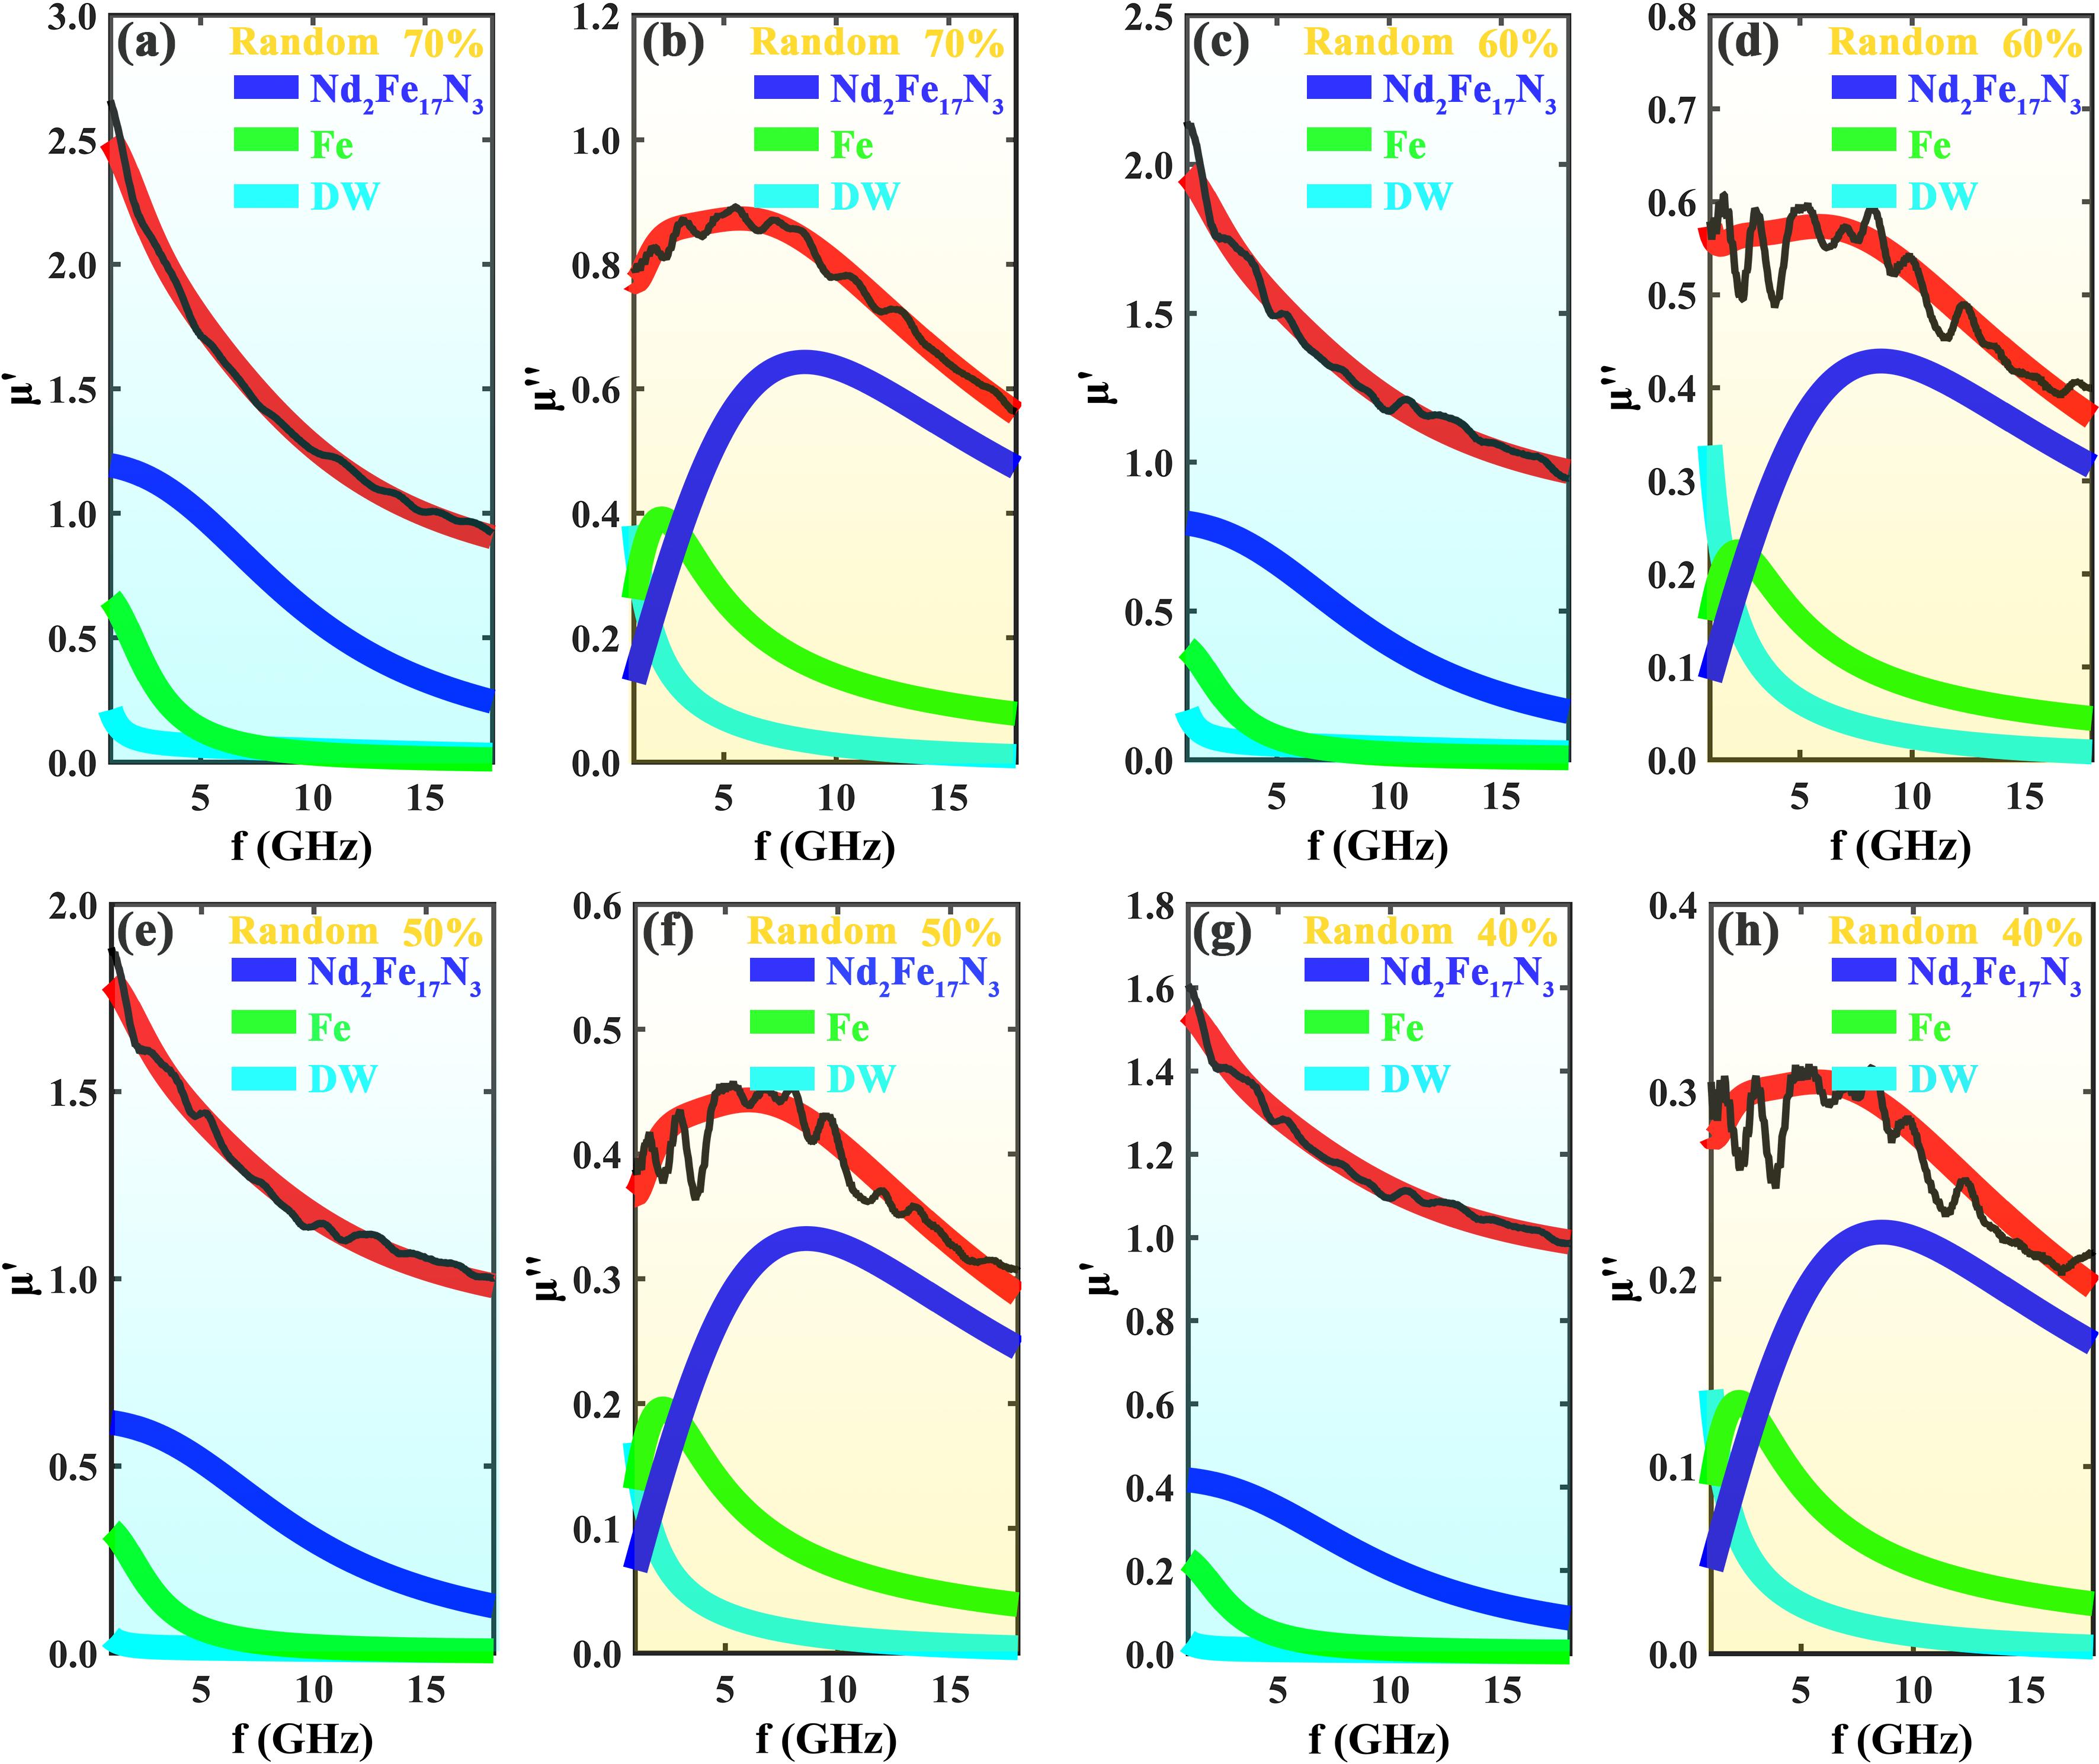


Fig. 3 Fitted frequency spectra of complex permeability of absorbers before magnetic orientation.

1. Fitted frequency spectra of complex permeability of absorbers after magnetic orientation


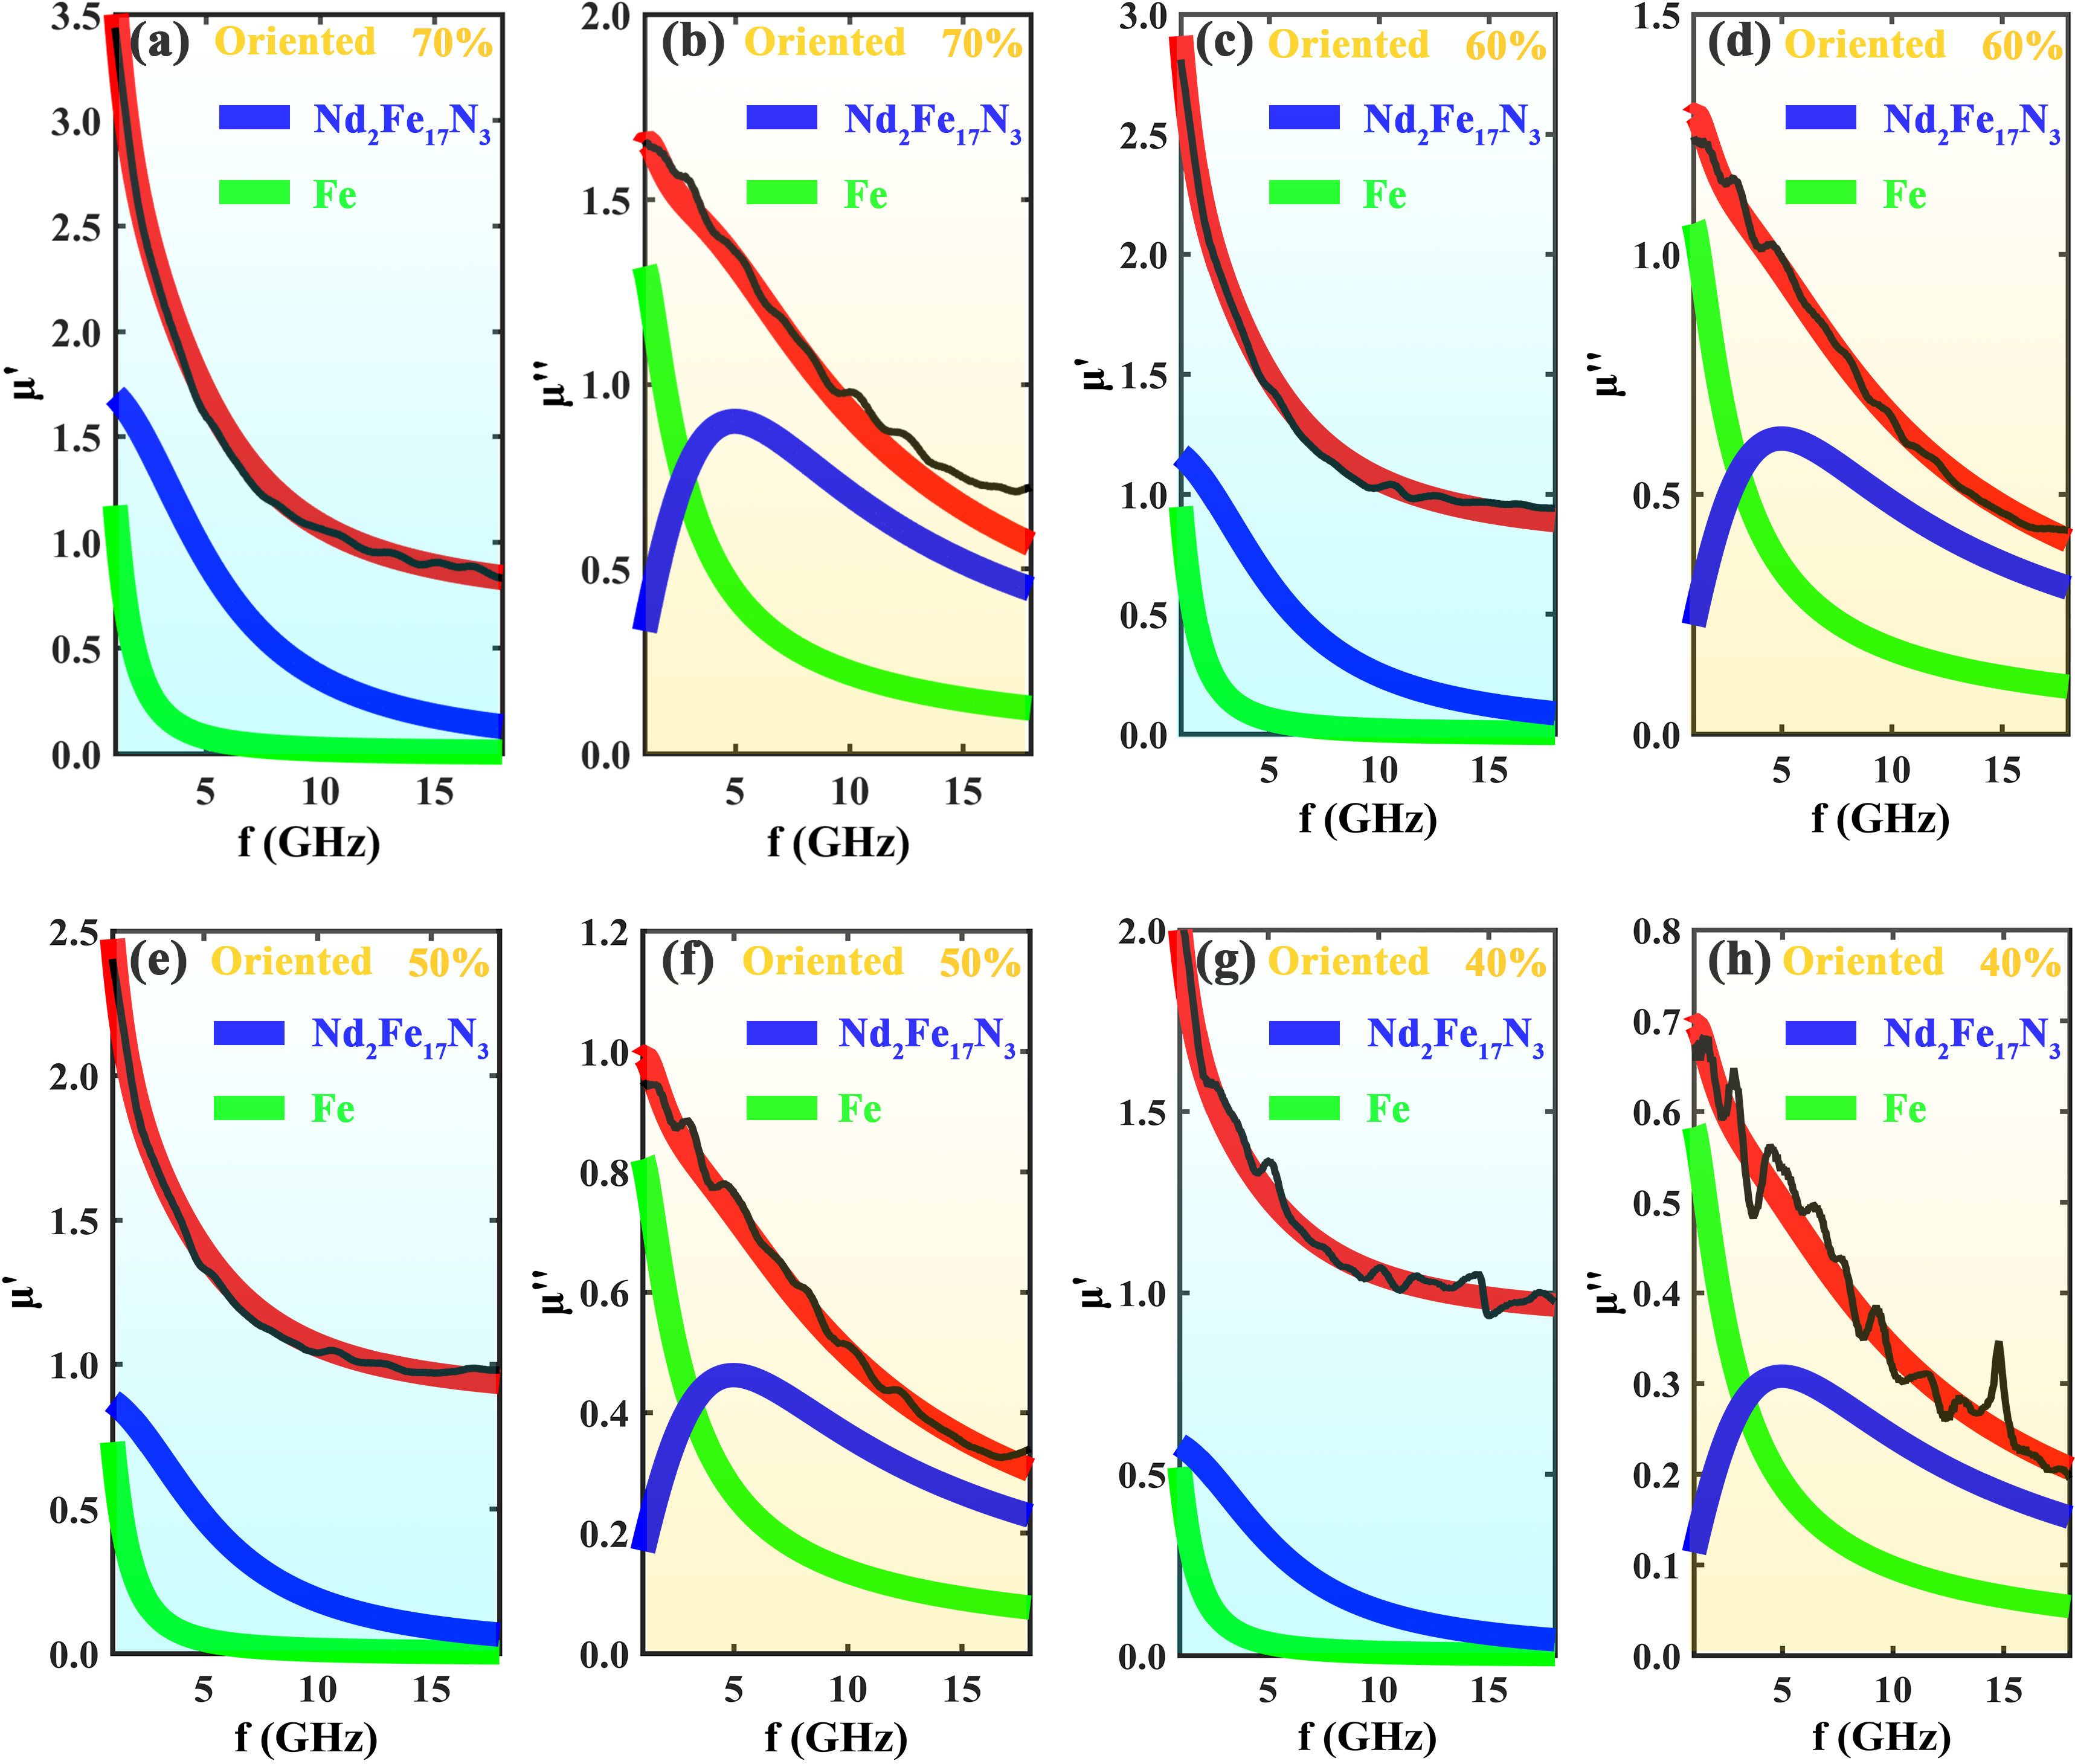


Fig. 4 Fitted frequency spectra of complex permeability of absorbers after magnetic orientation.

1. Microwave absorption curves in 1-18 GHz of absorbers before and after magnetic orientation


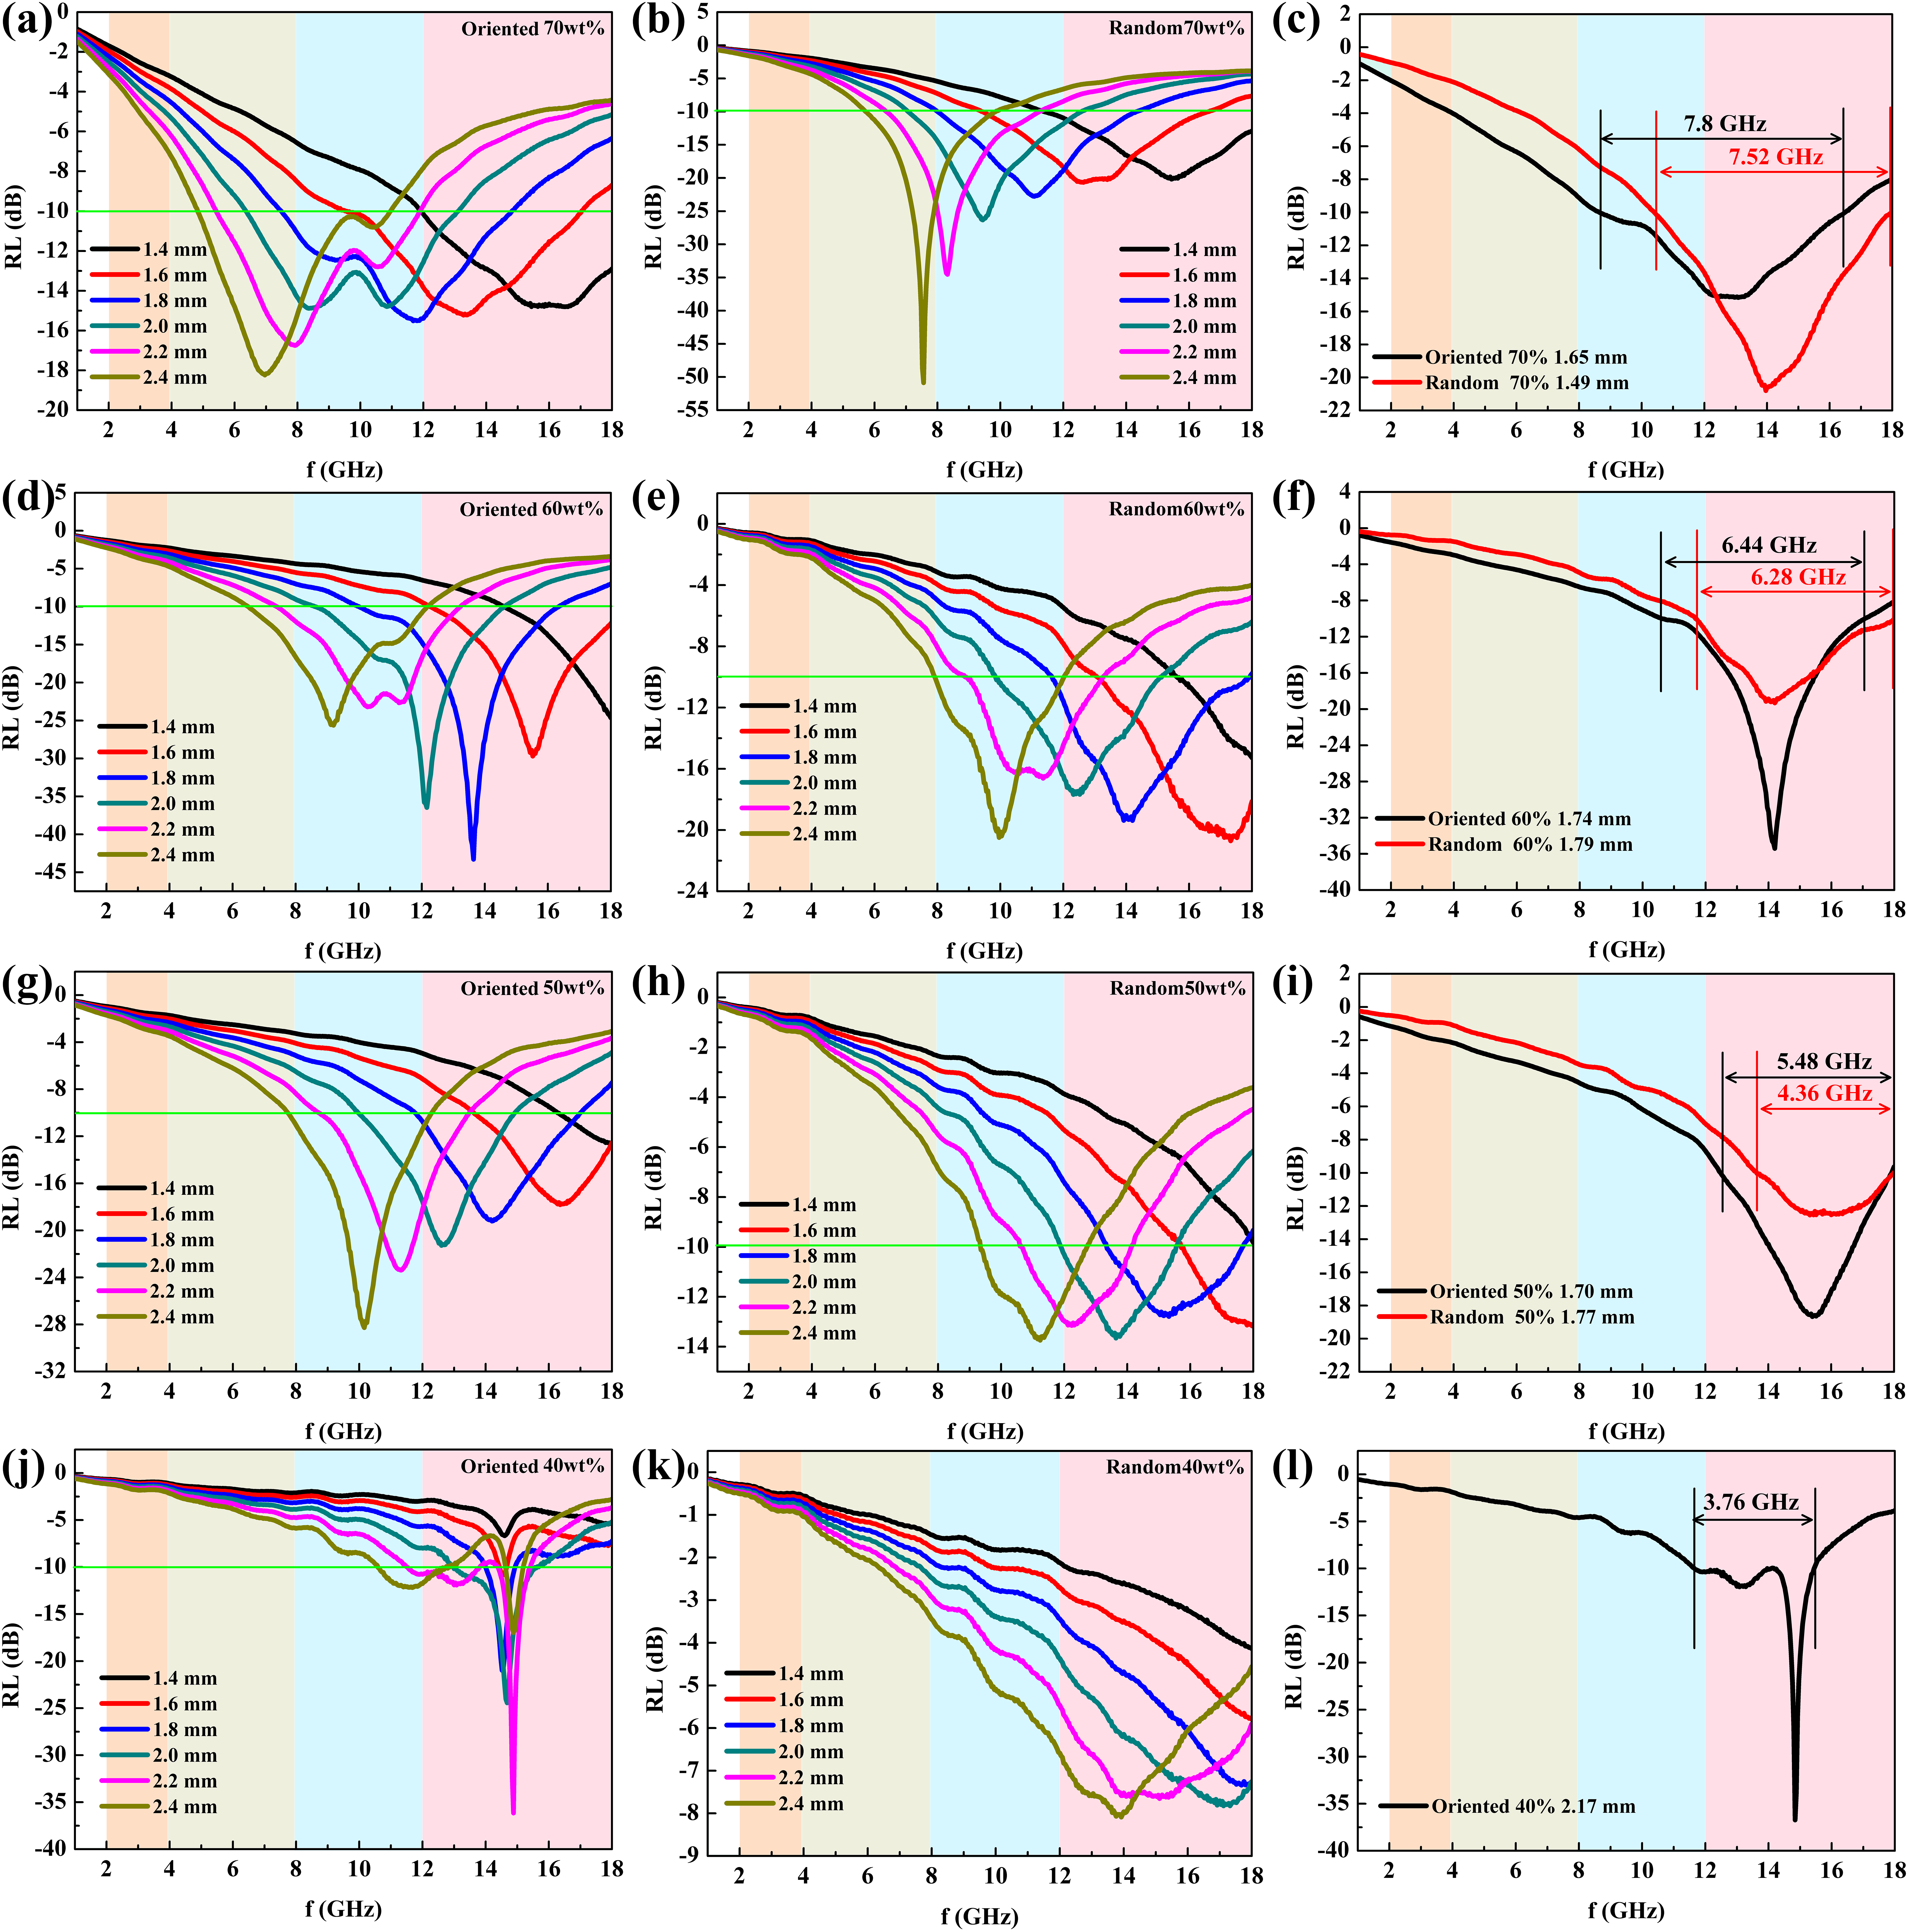


Fig. 5 Microwave absorption curves in 1-18 GHz of absorbers before and after magnetic orientation.
